# Supplementary material for: Functional integration between defence and IRE1-mediated ER stress response in rice
Source: PubMed Central journal article supplement — Sci Rep. 2012 Sep 19;2:670. doi: 10.1038/srep00670 (PMC3445914; doi:10.1038/srep00670), 2012-09-19
Supplement: srep00670-s1.pdf [file srep00670-s1.pdf]

## Supplementary Information

### Functional integration between defence and IRE1-mediated ER stress response in rice.

Shimpei Hayashi, Yuhya Wakasa and Fumio Takaiwa

**Figure S1.** Gene expression induced by ER stress is also suppressed by benzothiadiazole.

**Figure S2.** Gene expression induced by DTT is also suppressed by SA.

**Figure S3.** SA treatment slightly induces ER stress.

**Table S1.** Oligonucleotides used in this study.

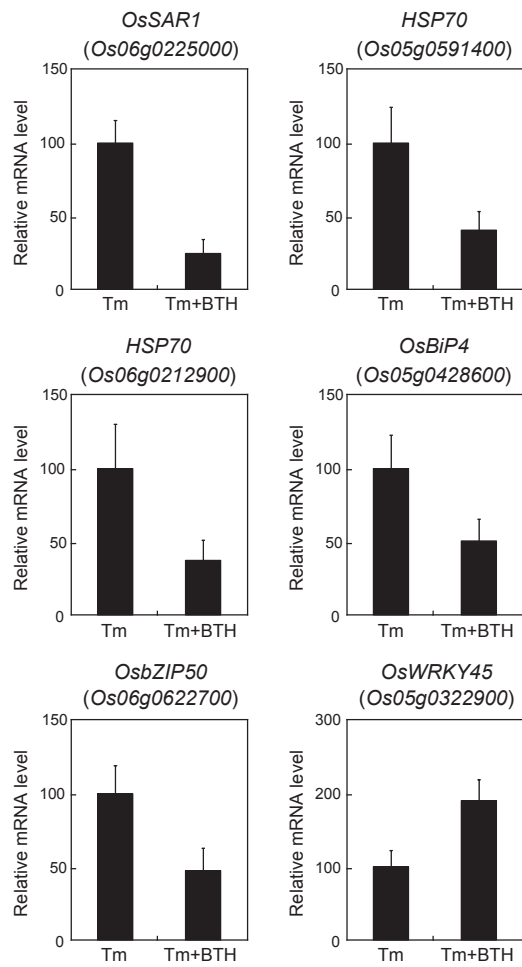

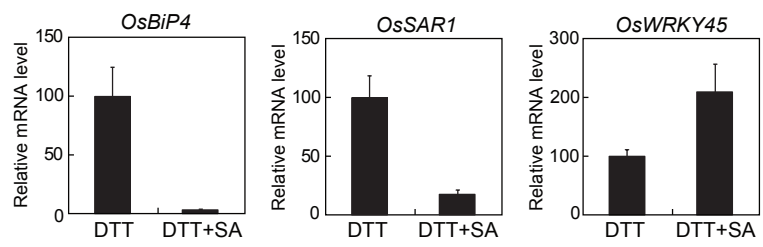

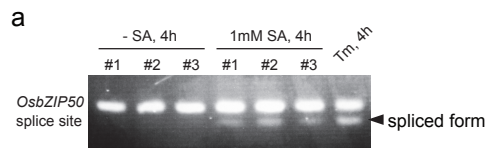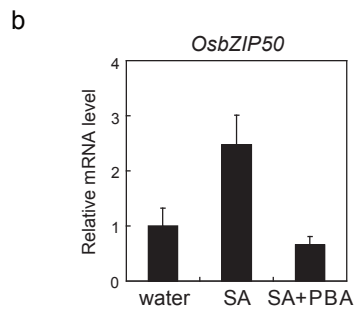

**Table S1. Oligonucleotides used in this study**

| Name              | Sequence                   | Purpose                            |
|-------------------|----------------------------|------------------------------------|
| Ubiquitin F       | GTGGTGGCCAGTAAGTCCTC       | qRT-PCR                            |
| Ubiquitin R       | GGACACAATGATTAGGGATCA      | qRT-PCR                            |
| OsWRKY45 F        | CGGGTAAAACGATCGAAAGAAG     | qRT-PCR                            |
| OsWRKY45 R        | CGAAAGCGGAAGAACAGGATTAC    | qRT-PCR                            |
| OsWRKY45pro F     | CAGTCCATGGAAACCCCTCGTG     | ChIP-PCR                           |
| OsWRKY45pro R     | CCGAAGGAGATGATGCGTAG       | ChIP-PCR                           |
| Os07g0418500 F    | TTCTATAAGAGTTTGCCACTTCG    | qRT-PCR                            |
| Os07g0418500 R    | CAAATACATTGTCTGAATAACATC   | qRT-PCR                            |
| Os07g0129200 F    | CGTATGCTATGCTACGTGTTTATG   | qRT-PCR                            |
| Os07g0129200 R    | CACTAAGCAAATACGGCTGAC      | qRT-PCR                            |
| Os02g0115900 F    | GGTGACTTACTACTACCTTG       | qRT-PCR                            |
| Os02g0115900 R    | GAAGAGCTGTTCTACTACTCGAC    | qRT-PCR                            |
| Os03g0710500 F    | TACTCCTCTGTTCAGGGTG        | qRT-PCR                            |
| Os03g0710500 R    | GCTTGATGTCGAAGATGGTG       | qRT-PCR                            |
| Os05g0367800 F    | CAAGGAGGAGTACGAGGAGAAG     | qRT-PCR                            |
| Os05g0367800 R    | CTAAAGCTCATCGTGATCGTC      | qRT-PCR                            |
| Os05g0428600 F    | TGCTAAGCTAGCTAGCTCCTG      | qRT-PCR                            |
| Os05g0428600 R    | CACACTTCGATCGAATCCAAAC     | qRT-PCR                            |
| Os08g0197700 F    | AAGGAGGAGTACGAGGAGAAG      | qRT-PCR                            |
| Os08g0197700 R    | CTAGCAGCGACTAAACTAAAG      | qRT-PCR                            |
| Os06g0225000 F    | TTCTACATGCTCTCACAAG        | qRT-PCR                            |
| Os06g0225000 R    | ACCACGTAAACTACTGCATC       | qRT-PCR                            |
| Os05g0591400 F    | TCGACCCTTGCTACGACTAC       | qRT-PCR                            |
| Os05g0591400 R    | AGTTCATCATTTCGATGATGTTG    | qRT-PCR                            |
| Os06g0212900 F    | CTCTCGTGTAGCTTATGCTTTG     | qRT-PCR                            |
| Os06g0212900 R    | AACTAGTAAAACGACTCCAG       | qRT-PCR                            |
| Os06g0622700 F    | TGGATGGCGATGATCCCATGAGC    | qRT-PCR                            |
| Os06g0622700 R    | TGCGCAGCACTGAAGCGCGTAG     | qRT-PCR                            |
| Os03g0663400 F    | GACTACCAGATCGTCTTCTGC      | qRT-PCR                            |
| Os03g0663400 R    | CCAACAAGTGATCACTCAGTGC     | qRT-PCR                            |
| Os05g0477900 F    | TGAGGTGGAAGCAGCACTTTCG     | qRT-PCR                            |
| Os05g0477900 R    | TGGTGATTGATCGGACAAGC       | qRT-PCR                            |
| Os06g0726100 F    | GTTGATATTTGATCCGAGCAGAC    | qRT-PCR                            |
| Os06g0726100 R    | GAATGATCAAATCTTTGTTTATAGAG | qRT-PCR                            |
| Os11g0645400 F    | CTGCCACGGATGCTACTACTAC     | qRT-PCR                            |
| Os11g0645400 R    | GATAATTGACAAATCTCATG       | qRT-PCR                            |
| OsbZIP50 splice F | GTGCCGCCACAGCCATGCAG       | detection of spliced bZIP50 mRNA   |
| OsbZIP50 splice R | GATGCTCACGAGCCAAAGCAG      | detection of spliced OsbZIP50 mRNA |

## Supplementary Figure Legends

### **Figure S1. Gene expression induced by ER stress is also suppressed by benzothiadiazole.**

mRNA levels, determined by Quantitative RT-PCR, of representative ER stress-inducible genes in wild type seedlings after treatment with tunicamycin (Tm) or Tm and benzothiadiazole (Tm+BTH) for 4 h. Data are expressed as means  $\pm$  s.d. of four biological replicates.

### **Figure S2. Gene expression induced by DTT is also suppressed by SA.**

mRNA levels, determined by Quantitative RT-PCR, of representative ER stress-inducible genes in wild type seedlings after treatment with DTT and SA for 2 h. Data are expressed as means  $\pm$  s.d. of four biological replicates.

### **Figure S3. SA treatment slightly induces ER stress.**

a) RT-PCR analysis for detection of OsIRE1-mediated mRNA splicing. b) Quantitative RT-PCR analysis of *OsbZIP50* transcripts in wild type plants after treatment for 4 h with SA or SA and 4-phenylbutyric acid (SA+PBA). For SA treatment, 1 mM SA was used. Data are expressed as means  $\pm$  s.d. of three to five biological replicates.
